# Supplementary material for: High-performance perovskite memristor by integrating a tip-shape contact
Source: Royal Society of Chemistry journal article supplement (doi:10.1039/d1tc04164a), 2021-01-01
Supplement: d1tc04164a1.pdf [file d1tc04164a1.pdf]

## Support Information

### High performance perovskite memristor by integrating tip shape

#### contact

Jiangming Chen,<sup>a</sup> Zihao Feng,<sup>c</sup> Mingtao Luo,<sup>c</sup> Junjie Wang,<sup>a</sup> Zhanpeng Wang,<sup>c</sup> Yue Gong,<sup>b</sup> Shenming Huang,<sup>a</sup> Fangsheng Qian,<sup>c</sup> Ye Zhou,<sup>c</sup> and Su-Ting Han<sup>\*b</sup>

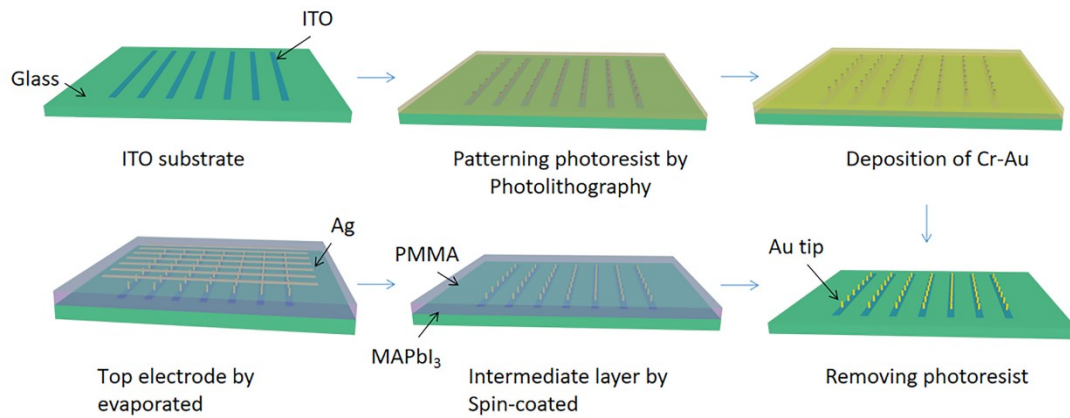

Figure S1. Schematic diagram showing the basic fabrication process of Ag/PMMA/MAPbI<sub>3</sub>/Au tip/ITO RRAM device.

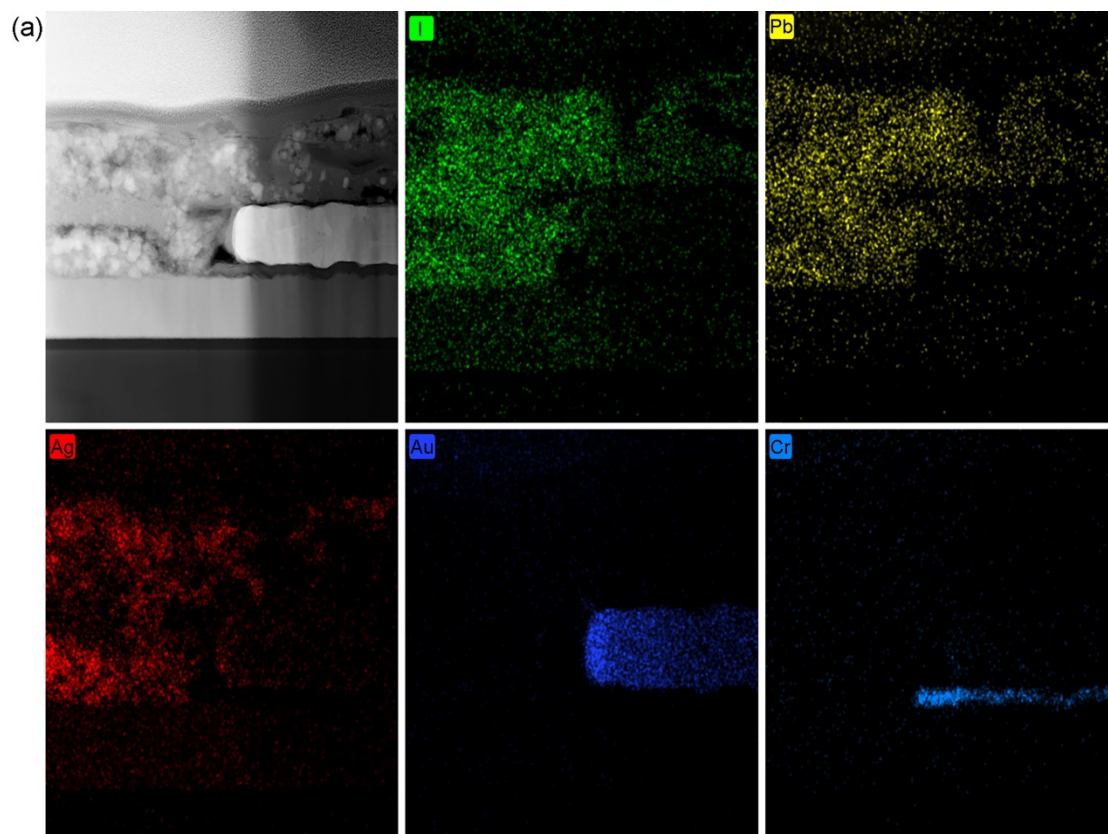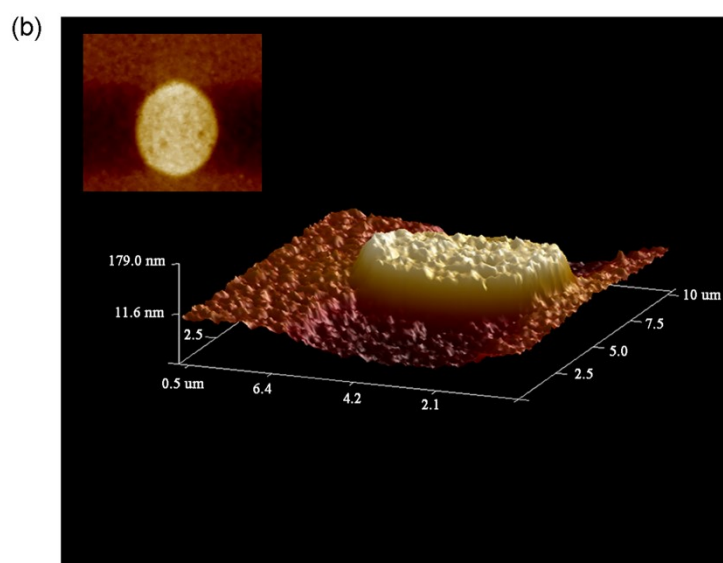

Figure S2. (a) TEM image and EDS mapping of Ag/PMMA/MAPbI<sub>3</sub>/Au tip/ITO structure at the interface in the initial state. (b) AFM image of the Au tip structure on the ITO substrate.

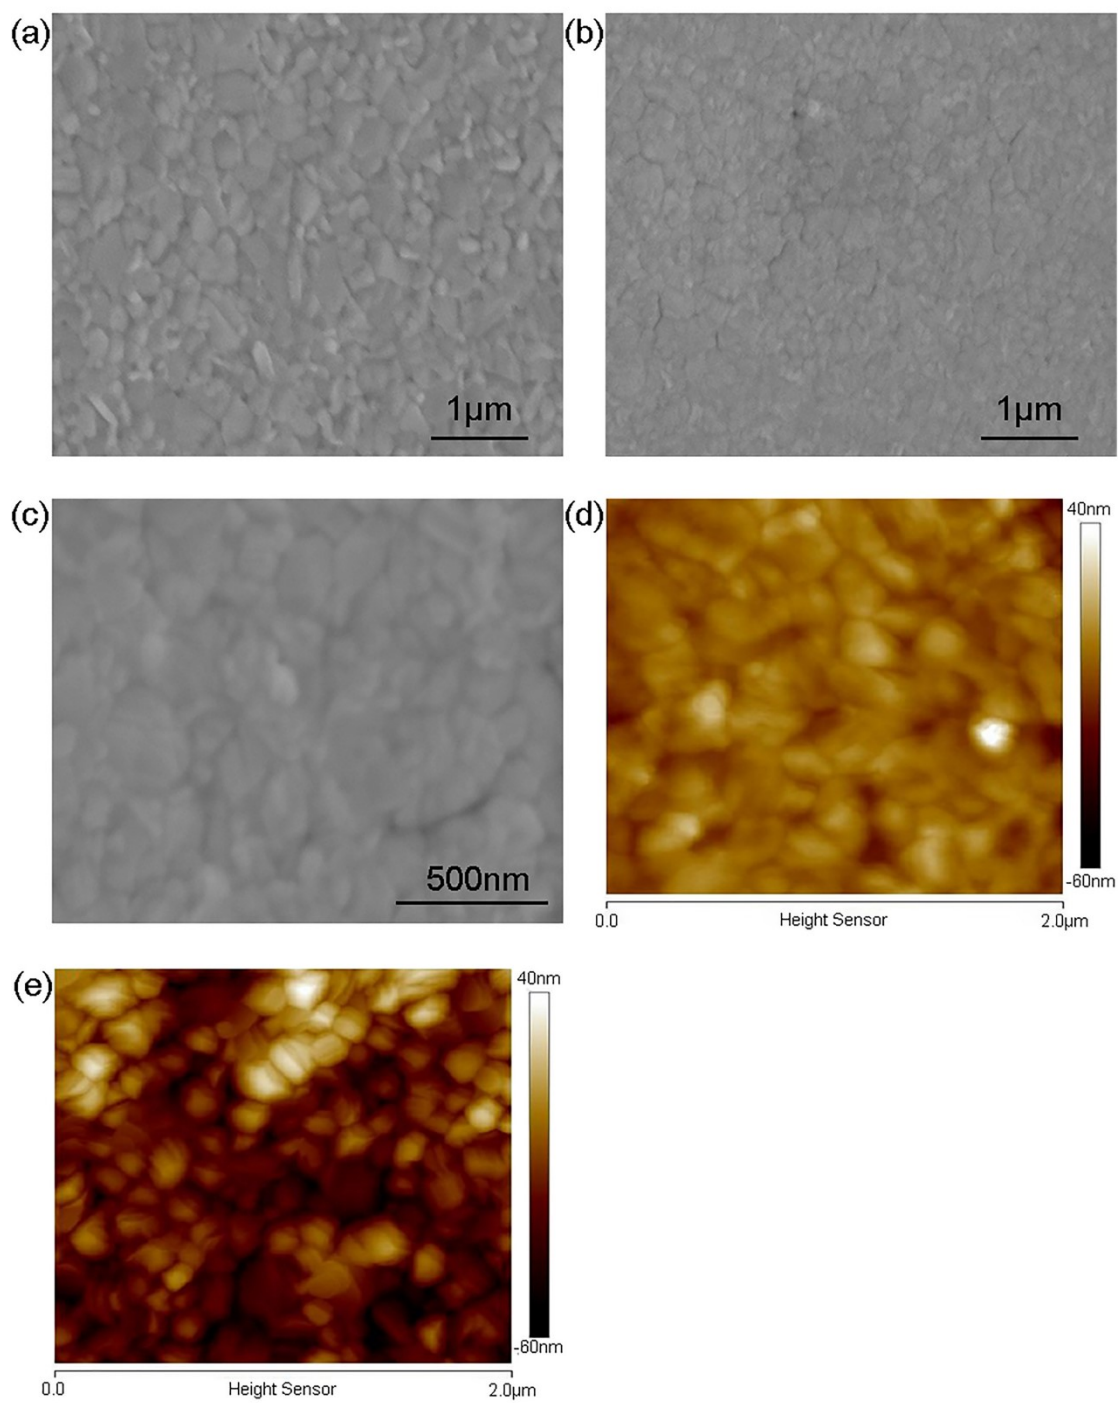

Figure S3. (a) Top-view FESEM image of the MAPbI<sub>3</sub> perovskite film with PMMA. (b-c) Top-view FESEM image of the MAPbI<sub>3</sub> perovskite film without PMMA. (d) AFM image of the MAPbI<sub>3</sub> perovskite film with PMMA. (e) AFM image of the MAPbI<sub>3</sub> perovskite film without PMMA.

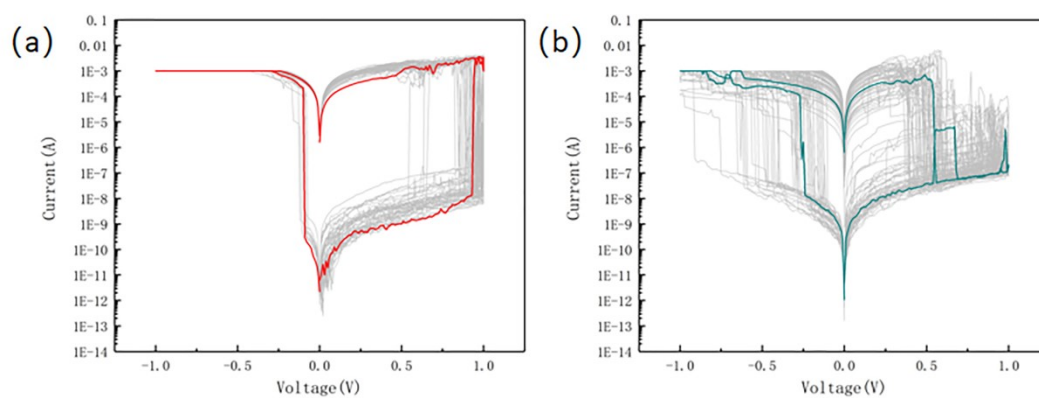

Figure S4. (a)  $I$ - $V$  curves of Ag/PMMA/MAPbI<sub>3</sub>/Au tip/ITO RRAM device in the flat state over 50 consecutive cycles. (b)  $I$ - $V$  curves of Ag/PMMA/MAPbI<sub>3</sub>/ITO RRAM device in the flat state over 50 consecutive cycles.

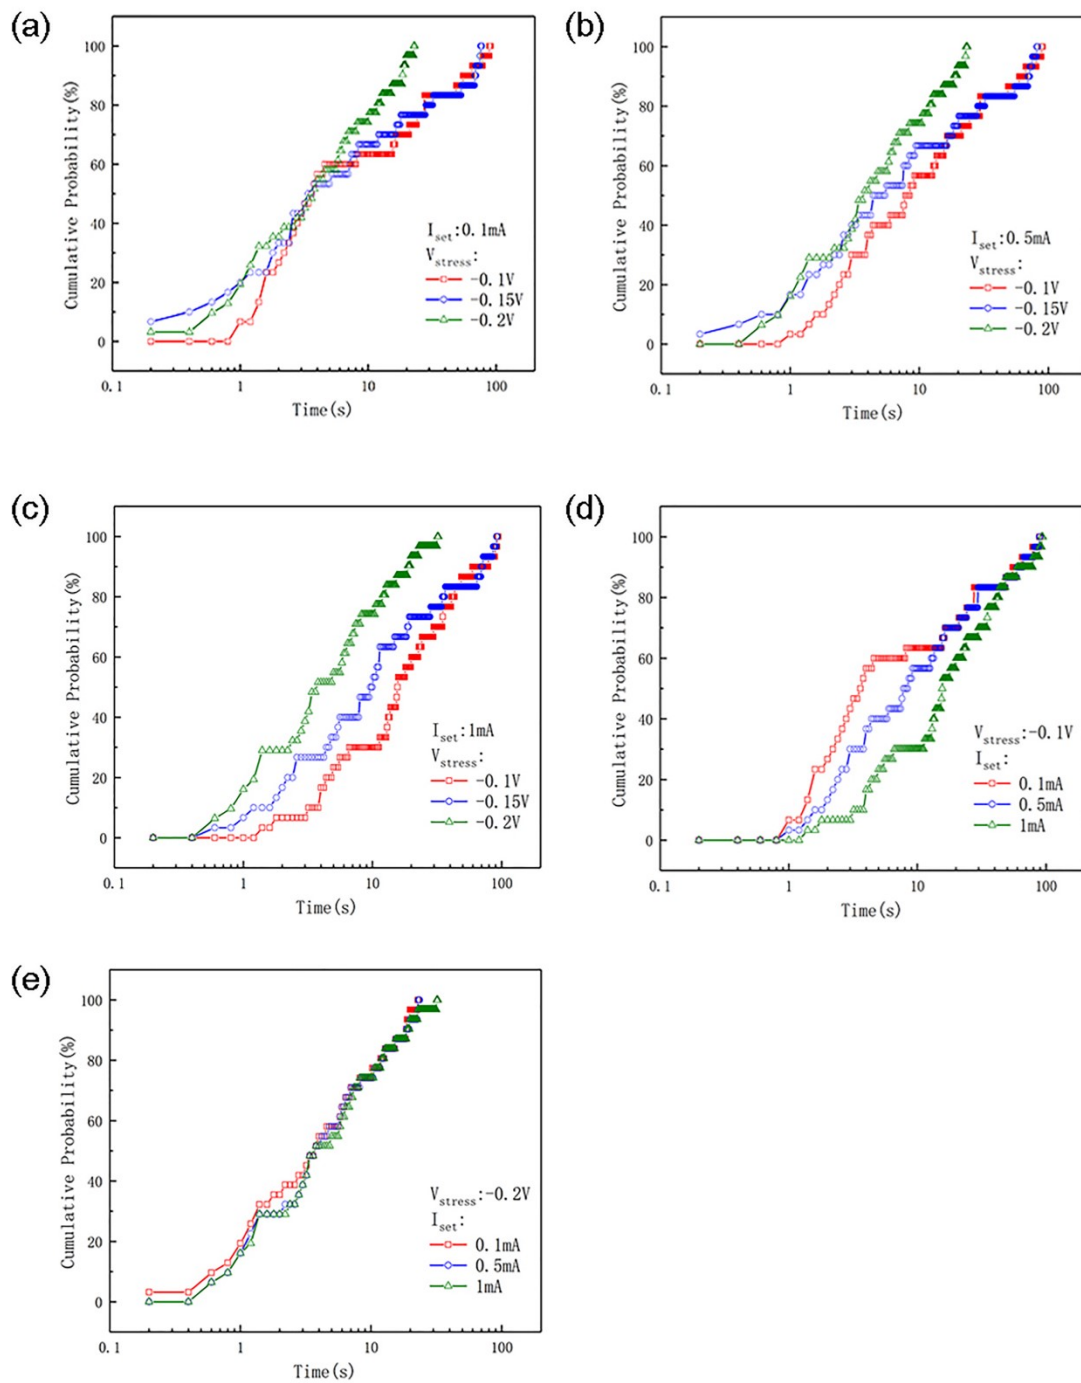

Figure S5. The cumulative probability of  $t_{\text{turn-on}}$  values under different  $V_{\text{Stress}}$  (from -0.1 V to -2 V) according to different  $I_{\text{CC}}$ . (a) 0.1 mA, (b) 0.5 mA, (c) 1 mA. The cumulative probability of  $t_{\text{turn-on}}$  values under different  $I_{\text{CC}}$  (from 0.1 mA to 1 mA) according to different  $V_{\text{Stress}}$ . (d) -0.1 V and (e) -0.2 V.

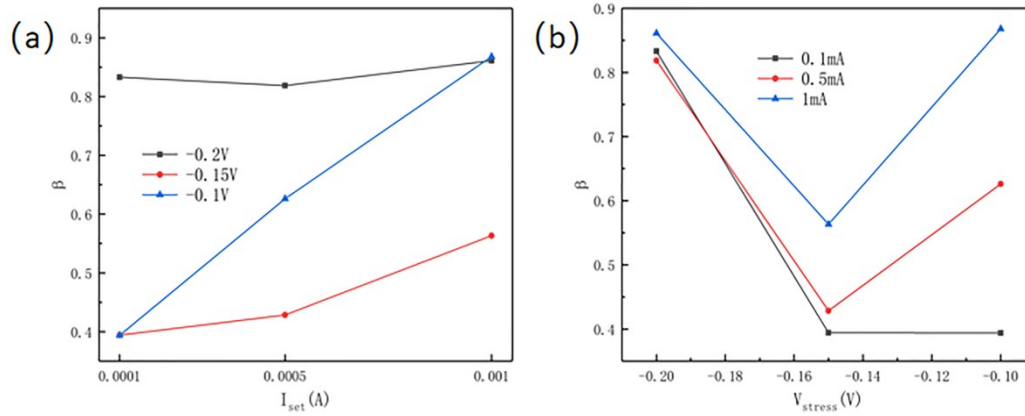

Figure S6. The variation of  $\beta$  for different (a)  $I_{CC}$  and (b)  $V_{Stress}$ .

| Material           | Density ( $\text{kg}\cdot\text{m}^{-3}$ ) | Electrical conductivity ( $\text{S}\cdot\text{m}^{-1}$ ) |
|--------------------|-------------------------------------------|----------------------------------------------------------|
| Au                 | 19320                                     | 2.00E-07                                                 |
| MAPbI <sub>3</sub> | 316                                       | 3.00E-07                                                 |
| PMMA               | 1150                                      | 5.00E-09                                                 |
| Ag                 | 10490                                     | 3.00E-08                                                 |

Table S1. Detailed parameters used for the simulations presented in Figure 4.

$$J = \sigma E$$

$$E = -\nabla V$$

Here,  $J$  is the current density,  $\sigma$  is the electrical conductivity,  $E$  is the electric field, and  $V$  is the electric potential. The applied voltage is -1 V. (Parameters used for the simulation were from the material library of COMSOL Multiphysics.)

| Material           | Size ( $\mu\text{m}$ ) | Height ( $\mu\text{m}$ ) |
|--------------------|------------------------|--------------------------|
| Au tip             | 3 (Radius)             | 0.2                      |
| MAPbI <sub>3</sub> | 500×500                | 0.3                      |
| PMMA               | 500×500                | 0.01                     |
| Ag                 | 500×500                | 0.03                     |

Table S2. Detailed geometric parameters used for the simulations presented in Figure 4.

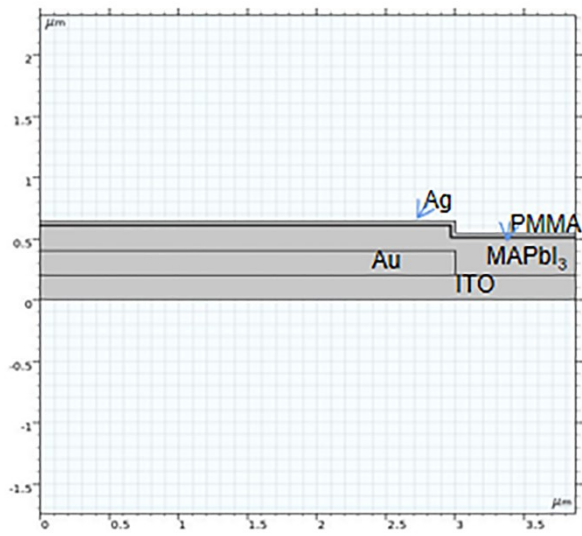

Figure S7. The distribution of the layer along the distance from the central point.

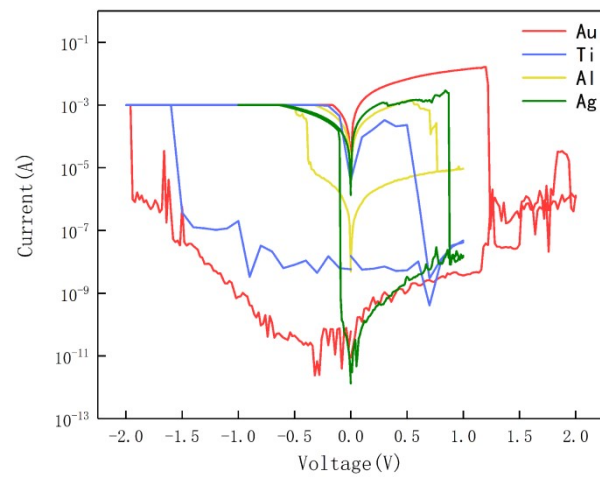

Figure S8. The I-V curves of different top electrodes (Au, Ti, Al, Ag) on the tip device.



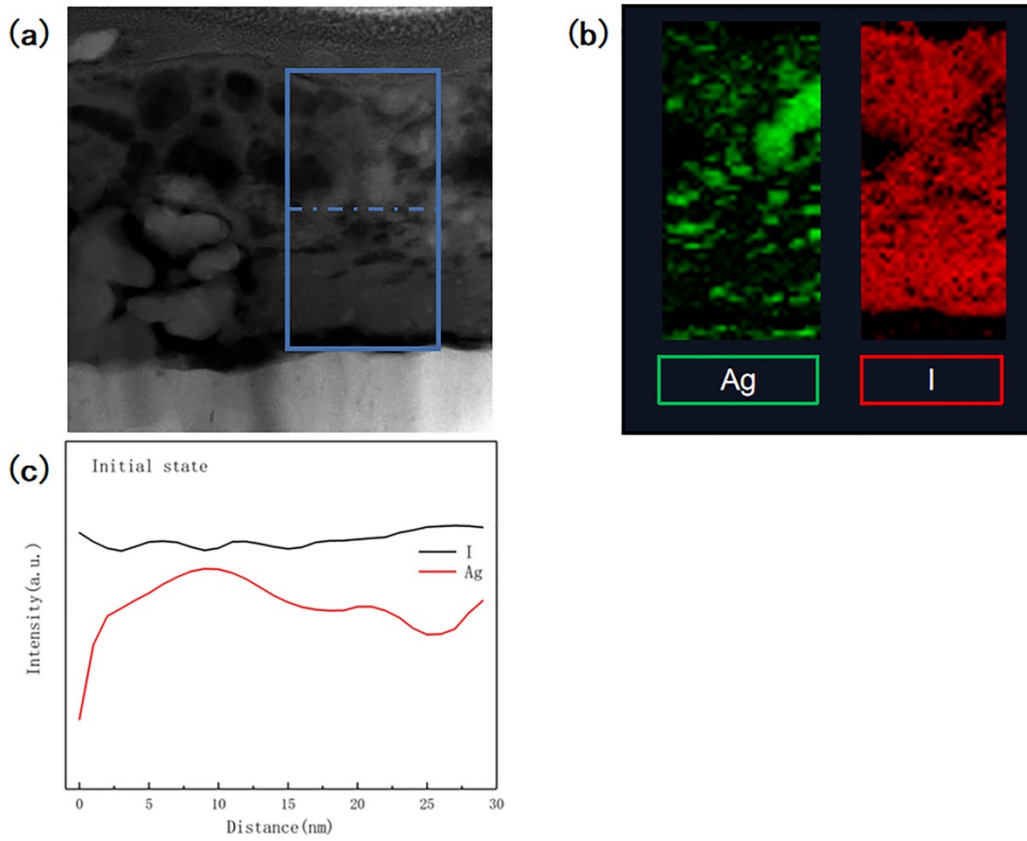

Figure S9. (a-b) TEM image and EELS mapping of Ag/PMMA/MAPbI<sub>3</sub>/Au tip/ITO in HRS.

(c) Elementary composition varied with distance along the scan line in (a).

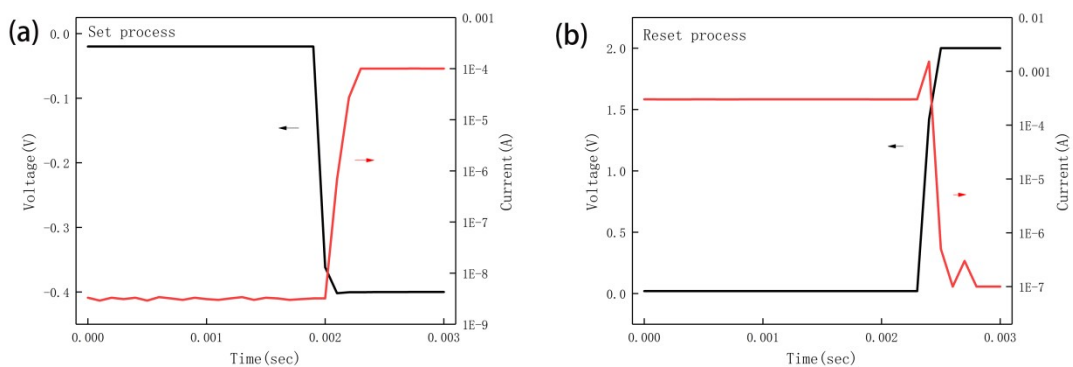

Figure S10. The response time of the tip RRAM device. The response times for SET and

RESET operations were about (a) 300  $\mu$ s and (b) 200  $\mu$ s, respectively.
